# Supplementary material for: A defective MoS2 monolayer as an efficient electrocatalyst for the nitrogen reduction reaction: a combined theoretical and experimental study
Source: Royal Society of Chemistry journal article supplement (doi:10.1039/d1se00346a), 2021-01-01
Supplement: d1se00346a1.pdf [file d1se00346a1.pdf]

## Supporting Information

for

### **Defective MoS<sub>2</sub> Monolayer as an Efficient Electrocatalyst for Nitrogen Reduction Reaction: A Combined Theoretical and Experimental Study**

Chaoqun Ma, Xu Yan, Hui He, Bingping Liu\* and Shihai Yan\*

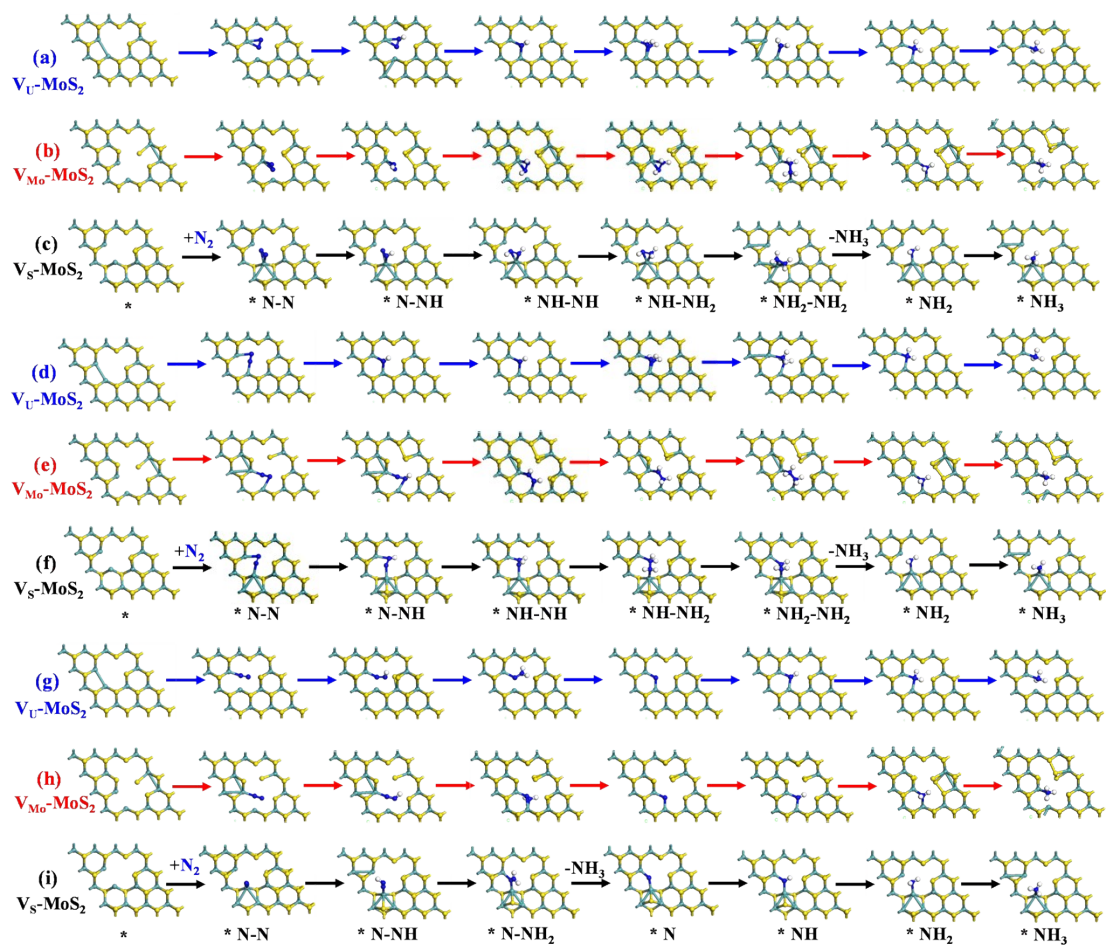

**Fig S1.** The optimized structures of all intermediates during the electrochemical NRR catalyzed by  $V_U\text{-MoS}_2$ ,  $V_{Mo}\text{-MoS}_2$ , and  $V_S\text{-MoS}_2$  through enzymatic (a ~ c), alternating (d ~ f), and (g ~ i) distal pathways.

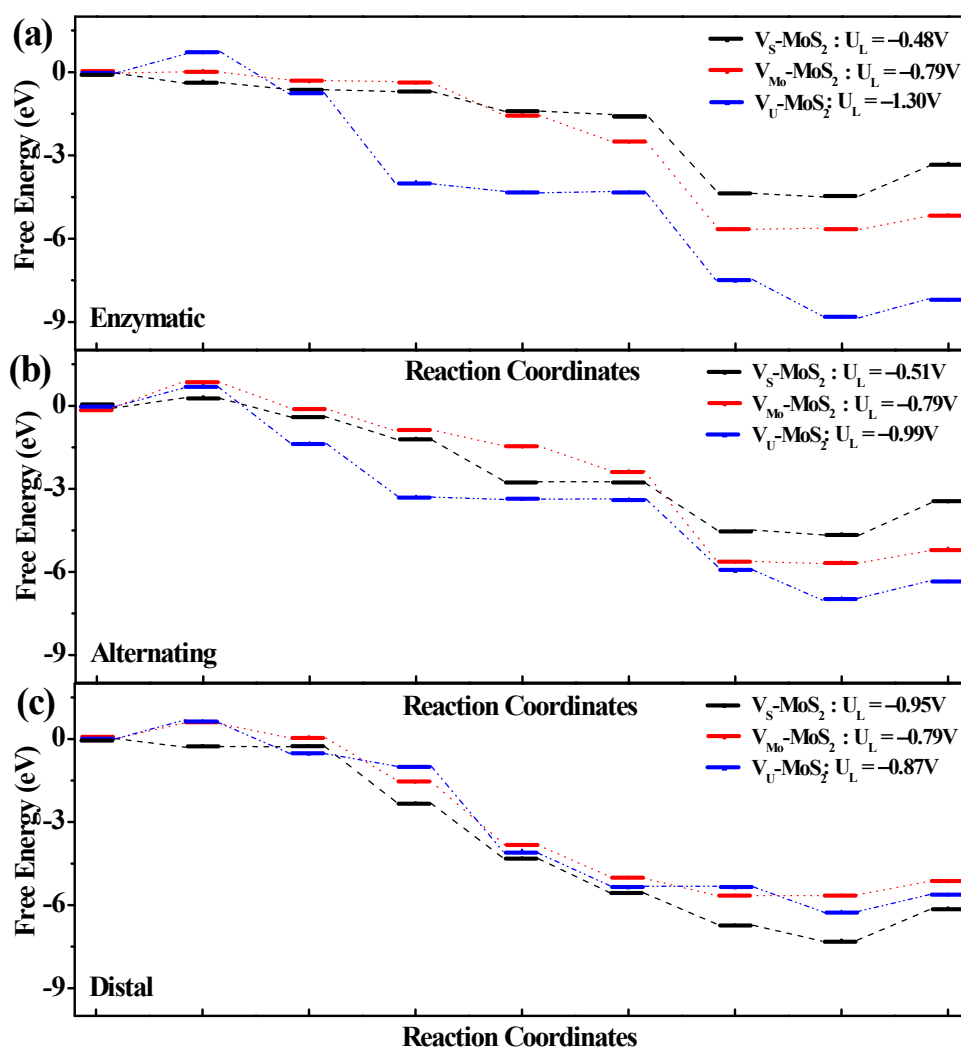

**Fig S2.** The calculated reaction free energy profiles of  $V_S$ - $MoS_2$ ,  $V_{Mo}$ - $MoS_2$ , and  $V_U$ - $MoS_2$ , with the limiting potential ( $U_L$ ) through enzymatic, alternating, and distal pathways.

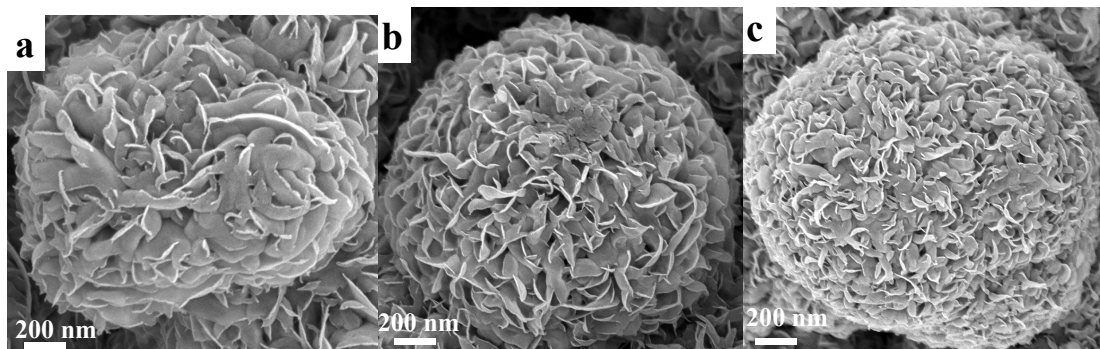

**Fig S3.** Scanning electron microscopy (SEM) image of (a)  $V_S$ - $MoS_2$ , (b)  $V_{M_0}$ - $MoS_2$ , and (c)  $V_U$ - $MoS_2$ .

**Table S1.** Comparison of  $U_L$  for  $V_S$ - $MoS_2$  with recently reported NRR electrocatalysts under ambient conditions.

| <b>Catalyst</b> | <b><math>U_L</math> (V)</b> | <b>Ref.</b> |
|-----------------|-----------------------------|-------------|
| $V_S$ - $MoS_2$ | -0.48                       | This work   |
| Re (111)        | -0.50                       | [1]         |
| Ti- $C_3N_4$    | -0.51                       | [2]         |
| Mo-graphene     | -0.54                       | [3]         |
| Mo-MoP          | -0.95                       | [4]         |
| V-MoP           | -0.65                       | [4]         |
| $FeB_6$         | -0.68                       | [5]         |
| Tc-BN           | -0.59                       | [6]         |

**Table S2.** Comparison of NH<sub>3</sub> yield and FE for V<sub>S</sub>-MoS<sub>2</sub> with recently reported NRR electrocatalysts at ambient conditions

| <b>Catalyst</b>                                  | <b>NH<sub>3</sub> yield rate<br/>(<math>\mu\text{g h}^{-1} \text{mg}^{-1}_{\text{cat.}}</math>)</b> | <b>FE (%)</b> | <b>Ref.</b> |
|--------------------------------------------------|-----------------------------------------------------------------------------------------------------|---------------|-------------|
| V <sub>S</sub> -MoS <sub>2</sub>                 | 29.55                                                                                               | 4.58          | This work   |
| VO <sub>2</sub>                                  | 14.85                                                                                               | 3.97          | [7]         |
| Fe <sub>2</sub> (MoO <sub>4</sub> ) <sub>3</sub> | 7.5                                                                                                 | 1.0           | [8]         |
| Ru NPs                                           | 24.88                                                                                               | 0.35          | [9]         |
| B-TiO <sub>2</sub>                               | 14.4                                                                                                | 3.4           | [10]        |
| Cr-CeO <sub>2</sub>                              | 16.82                                                                                               | 3.84          | [11]        |
| Mn <sub>3</sub> O <sub>4</sub>                   | 11.6                                                                                                | 3.0           | [12]        |
| PEBCD/C                                          | 2.01                                                                                                | 2.91          | [13]        |
| Mn <sub>3</sub> O <sub>4</sub> /rGO              | 17.4                                                                                                | 3.52          | [14]        |
| C-TiO <sub>2</sub>                               | 16.22                                                                                               | 1.84          | [15]        |
| DR-fluorographene                                | 9.3                                                                                                 | 4.2           | [16]        |
| V <sub>O</sub> -CeO <sub>2</sub>                 | 16.4                                                                                                | 3.7           | [17]        |
| Fe <sub>2</sub> O <sub>3</sub> nanorods          | 15.9                                                                                                | 0.94          | [18]        |
| TiO <sub>2</sub> /rGO                            | 15.13                                                                                               | 3.3           | [19]        |

## References:

- 1 J. H. Montoya, C. Tsai, A. Vojvodic, J. K. Nørskov *ChemSusChem*, 2015, **8**, 2180-2186.
- 2 X. Chen, X. Zhao, Z. Kong, W.-J. Ong, N. Li *Journal of Materials Chemistry A*, 2018, **6**, 21941-21948.
- 3 Z. W. Chen, X. Y. Lang, Q. Jiang *Journal of Materials Chemistry A*, 2018, **6**, 9623-9628.
- 4 M. Han, G. Wang, H. Zhang, H. Zhao *Physical Chemistry Chemical Physics*, 2019, **21**, 5950-5955.
- 5 Q. Li, C. Liu, S. Qiu, F. Zhou, L. He, X. Zhang, C. Sun *Journal of Materials Chemistry A*, 2019, **7**, 21507-21513.
- 6 Z. Ma, Z. Cui, C. Xiao, W. Dai, Y. Lv, Q. Li, R. Sa *Nanoscale*, 2020, **12**, 1541-1550.
- 7 R. Zhang, H. Guo, L. Yang, Y. Wang, Z. Niu, H. Huang, H. Chen, L. Xia, T. Li, X. Shi, X. Sun, B. Li, Q. Liu *ChemElectroChem*, 2019, **6**, 1014-1018.
- 8 C. Chen, Y. Liu, Y. Yao *European Journal of Inorganic Chemistry*, 2020, **2020**, 3236-3241.
- 9 L. Zhao, J. Zhao, J. Zhao, L. Zhang, D. Wu, H. Wang, J. Li, X. Ren, Q. Wei *Nanotechnology*, 2020, **31**, 29LT01.
- 10 Y. Wang, K. Jia, Q. Pan, Y. Xu, Q. Liu, G. Cui, X. Guo, X. Sun *ACS Sustainable Chemistry & Engineering*, 2018, **7**, 117-122.
- 11 H. Xie, H. Wang, Q. Geng, Z. Xing, W. Wang, J. Chen, L. Ji, L. Chang, Z. Wang, J. Mao *Inorganic Chemistry*, 2019, **58**, 5423-5427.
- 12 X. Wu, L. Xia, Y. Wang, W. Lu, Q. Liu, X. Shi, X. Sun *Small*, 2018, **14**, 1803111.
- 13 G.-F. Chen, X. Cao, S. Wu, X. Zeng, L.-X. Ding, M. Zhu, H. Wang *Journal of the American Chemical Society*, 2017, **139**, 9771-9774.
- 14 H. Huang, F. Gong, Y. Wang, H. Wang, X. Wu, W. Lu, R. Zhao, H. Chen, X. Shi, A. M. Asiri, T. Li, Q. Liu, X. Sun *Nano Research*, 2019, **12**, 1093-1098.
- 15 K. Jia, Y. Wang, Q. Pan, B. Zhong, Y. Luo, G. Cui, X. Guo, X. Sun *Nanoscale Advances*, 2019, **1**, 961-964.
- 16 J. Zhao, J. Yang, L. Ji, H. Wang, H. Chen, Z. Niu, Q. Liu, T. Li, G. Cui, X. Sun *Chemical Communications*, 2019, **55**, 4266-4269.
- 17 B. Xu, L. Xia, F. Zhou, R. Zhao, H. Chen, T. Wang, Q. Zhou, Q. Liu, G. Cui, X. Xiong, F. Gong, X. Sun *ACS Sustainable Chemistry & Engineering*, 2019, **7**, 2889-2893.
- 18 X. Xiang, Z. Wang, X. Shi, M. Fan, X. Sun *ChemCatChem*, 2018, **10**, 4530-4535.
- 19 X. Zhang, Q. Liu, X. Shi, A. M. Asiri, Y. Luo, X. Sun, T. Li *Journal of Materials Chemistry A*, 2018, **6**, 17303-17306.
